# Supplementary material
Source: PubMed Central journal article supplement (PMC8451180)

**Disclosure Purpose:** 21-13151

## Summary of Interests

**Company or Organization**

| Entity                                                        | Type       | Interest Held By                                                                                        |
|---------------------------------------------------------------|------------|---------------------------------------------------------------------------------------------------------|
| <a href="#">Emergent Biosolutions Inc.</a>                    | Consultant | Self                                                                                                    |
| <i>Category:</i> Consultant<br><i>Additional Information:</i> |            | <i>Description:</i> Contract with University of Florida to advise on their chikungunya vaccine program. |

## Certification

I certify that the information provided in this disclosure is complete and accurate.

# Joseph Hogan

Aug 09, 2021 17:01:10 EDT  
New England Journal of Medicine - Solicited Submission Disclosures

**Disclosure Purpose:** 21-13151

## Summary of Interests

I do not have any interests to disclose at this time.

## Certification

I certify that the information provided in this disclosure is complete and accurate.

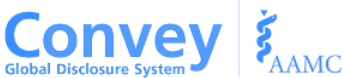

# Mireille Schnitzer

Aug 06, 2021 12:00:17 EDT  
New England Journal of Medicine - Solicited Submission Disclosures

**Disclosure Purpose:** 21-13151

## Summary of Interests

I do not have any interests to disclose at this time.

## Certification

I certify that the information provided in this disclosure is complete and accurate.

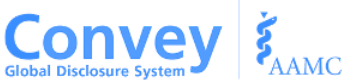

Supplement: NEJMe2113151_disclosures.pdf [file NEJMe2113151_disclosures.pdf]
